# Supplementary material
Source: publisher figshare collection journal article supplement (https://frontiersin.figshare.com/ndownloader/files/13644080)
Supplement: Supplementary file 1 [file 13644080]

***Supplementary Material IV***

**Re-building Communities: Voluntary Resettlement from Wildlife Reserves in India**

**Authors**: Krithi K. Karanth*, Sahila Kudalkar, Shivangi Jain

*** Correspondence:** Krithi K. Karanth, [krithi.karanth@cwsorg.in](mailto:krithi.karanth@cwsorg.in)

**Questionnaire**

| **Survey No:** | | | **Interviewer:** | | **Park:** |  | **Date:** | |  |  |  |  |  |
| --- | --- | --- | --- | --- | --- | --- | --- | --- | --- | --- | --- | --- | --- |
|  |  | |  |  | |  | | |  |  |  |  |  |
|  | **Name of Respondent** | |  | **Name of Household Head** | | **Caste Name:** | | |  |  |  |  |  |
|  |  | **Sex *0 = M; 1 = F*** | |  | **Sex *0 = M; 1 = F*** | ***0 = UC*** | | | ***1 = OBC*** | |  |  |  |
|  |  |  | ***2 = SC*** | | | ***4 = ST*** | |  |  |  |
|  | **BACKGROUND** | |  |  |  |  |  |  |  |  |  |  |  |
| **A1. Demographic information about household members, including respondent** | | | | | | | | |  |  |  |  |  |
|  |  |  |  |  |  |  |  |  |  |  |  |  |  |
| **S.No.** | | **Name** |  |  | **Relation to** |  | **Sex** |  | **Age** |  | **Education** | |  |
|  |  |  |  |  | **respondent** |  |  |  |  |  | **(years)** | |  |
|  |  |  |  |  |  |  |  |  |  |  |  |  |  |
| 1 |  |  |  |  |  |  |  |  |  |  |  |  |  |
|  |  |  |  |  |  |  |  |  |  |  |  |  |  |
| 2 |  |  |  |  |  |  |  |  |  |  |  |  |  |
|  |  |  |  |  |  |  |  |  |  |  |  |  |  |
| 3 |  |  |  |  |  |  |  |  |  |  |  |  |  |
|  |  |  |  |  |  |  |  |  |  |  |  |  |  |
| 4 |  |  |  |  |  |  |  |  |  |  |  |  |  |
|  |  |  |  |  |  |  |  |  |  |  |  |  |  |
| 5 |  |  |  |  |  |  |  |  |  |  |  |  |  |
|  |  |  |  |  |  |  |  |  |  |  |  |  |  |
| 6 |  |  |  |  |  |  |  |  |  |  |  |  |  |
|  |  |  |  |  |  |  |  |  |  |  |  |  |  |
| 7 |  |  |  |  |  |  |  |  |  |  |  |  |  |
|  |  |  |  |  |  |  |  |  |  |  |  |  |  |
| 8 |  |  |  |  |  |  |  |  |  |  |  |  |  |
|  |  |  |  |  |  |  |  |  |  |  |  |  |  |

**A2. Origin** Born here Moved here (Year____________)

**A3. Where and how often do you get information about outside events?**

*Not at all = 0; annually = 1; semi-annually = 2; quarterly = 3; monthly = 4; weekly = 5; daily = 6;*

| Newspapers | Radio | Television | Cable TV | Market | Officials | Internet | Other |
| --- | --- | --- | --- | --- | --- | --- | --- |
|  |  |  |  |  |  |  |  |
|  |  |  |  |  |  |  |  |

**A4. How much land does your household own? (Provide local units)**

| **Agricultural land (area)** | | |  |  | Legal title | | | Yes |  | No |  |
| --- | --- | --- | --- | --- | --- | --- | --- | --- | --- | --- | --- |
|  |  |  |  |  |  |  |  |  |  |  |  |
| **Non-agricultural land (area)** | | |  |  | Legal title | | | Yes |  | N0 |  |
|  |  |  |  |  |  |  |  |  |  |  |  |
| **A5. Uses of private land** (proportion and name) | | | | | | | |  |  |  |  |
|  |  |  |  |  | |  |  |  |  |  |  |
| Crop | CR1 | Harv1 | CR2 | Harv1 | | CR3 | Harv3 | CR4 | Harv4 | CR5 | Harv5 |
|  |  |  |  |  |  |  |  |  |  |  |  |
| Subsistence |  |  |  |  |  |  |  |  |  |  |  |
|  |  |  |  |  |  |  |  |  |  |  |  |
| Cash |  |  |  |  |  |  |  |  |  |  |  |
|  |  |  |  |  |  |  |  |  |  |  |  |

**A6. How many months of food for self-consumption do you derive from your farmland? __________**

**A7. Number of Rooms in the house:** *Mud-brick/stone* ***= ___________*** *Concrete* ***= ____________***

**A8. Education**

a. Number of children (< 14) not in school __________ b. Total expenditure Rs. ________________

**A9. Amount of total household cash income (Rs)**

| < 15,000 | 15-50,000 | 51-100,000 | 100-500,000 | > 500,000 |
| --- | --- | --- | --- | --- |
|  |  |  |  |  |
| **A10. Sources of cash income** | |  |  |  |
|  |  | |  | |
| Source | Men (1) or Women (2) or Both (3) | | Top sources (Yes/No and %age)_ | |
| Agriculture |  |  |  |  |
| NTFP |  |  |  |  |
| Fuelwood |  |  |  |  |
| Wage labor |  |  |  |  |
| Livestock |  |  |  |  |
| Salary or pension |  |  |  |  |
| Trade and business |  |  |  |  |


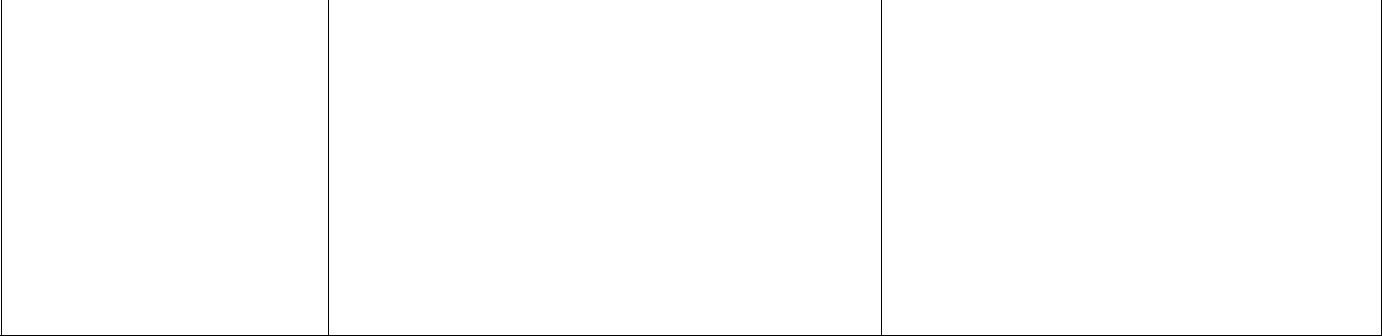


**Note: Percentage to be reported only if > 20% of total income**

**A11. Livestock**

| Name | Number | Wild animals responsible for | Number killed in | How often in | Grazed in V/ F/ |
| --- | --- | --- | --- | --- | --- |
|  | Owned | predation Y/N, species | the last 10 years | one year | CL/Other |
|  |  |  |  |  |  |
| Cattle |  |  |  |  |  |
| Sheep |  |  |  |  |  |
| Goats |  |  |  |  |  |
| Pigs |  |  |  |  |  |
| Chicken |  |  |  |  |  |
| Other: |  |  |  |  |  |
|  |  |  |  |  |  |

**A12. Nutrition**


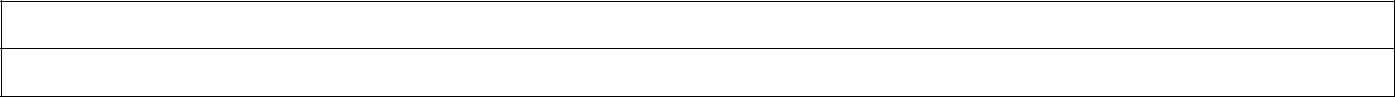


Number of weeks last year when the there was insufficient food in the household

Number of weeks last year when you were worried there might not be enough food for next week

**A13. Health:**

| Number of labor days lost to illness /year | Men | Women |
| --- | --- | --- |
|  |  |  |
| Amount of money spent on health care/ year | Men | Women |
|  |  |  |

**B1. Do you want to move? Yes or No** (Circle one)

**B2. Have you changed your decision recently? Yes or No** (Circle one)

| **Survey No:** | **Interviewer:** | **Park:** | **Date:** |
| --- | --- | --- | --- |
| **B3: Why has it changed?** |  |  |  |
|  |  |  |  |
| **Reasons** |  | Yes to No No to Yes | Why |


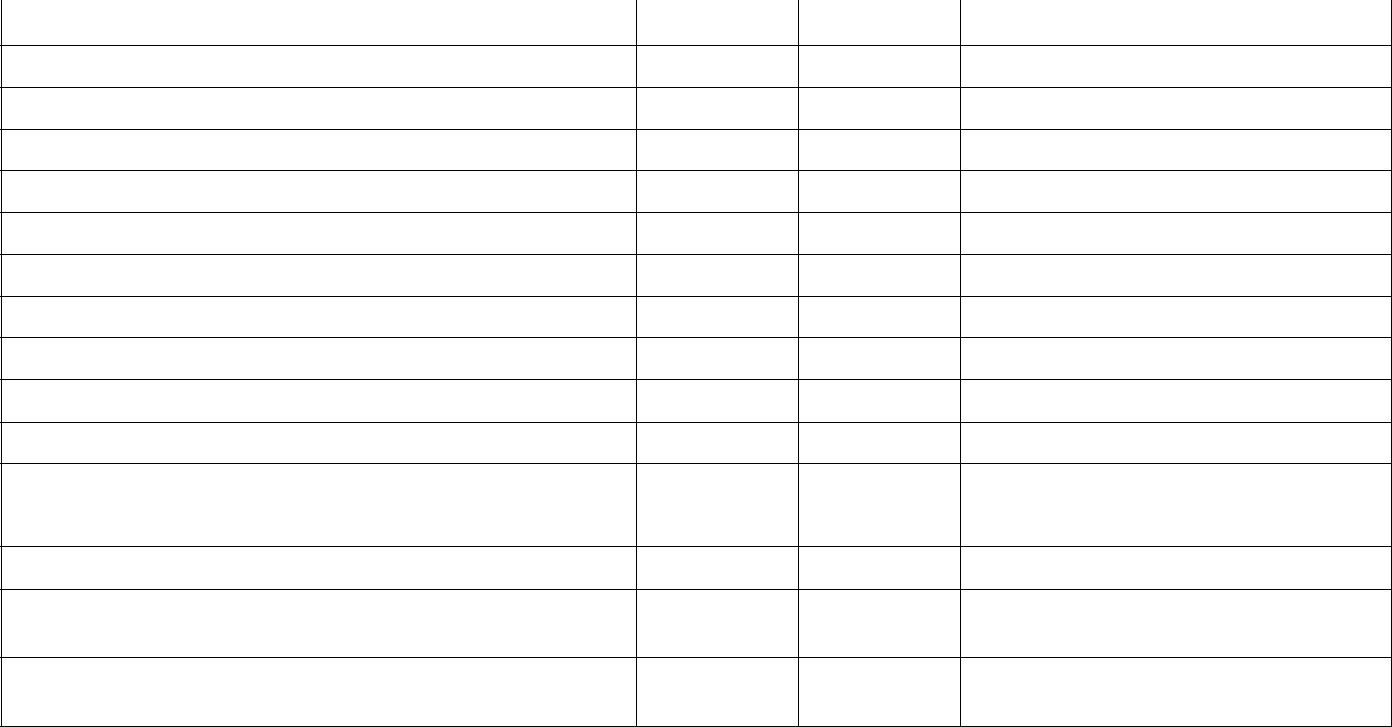


Self interest/request

NTCA Package

Human-wildlife conflicts

Interaction with forest department

Interaction with revenue department

Poor resources

Poor facilities and infrastructure

Pressure from others

Interaction with other people from village

Visit to potential sites

Interactions with other resettled people:

Where

Pressure from the government

Other (Specify)

Other (Specify)

**B4. Which of the reasons are the most important in your decision to move? (Select all that apply, identify top 3 reasons)**

| Reason |  |  | Check all that apply | | Rank top 3 reasons | |  |  |
| --- | --- | --- | --- | --- | --- | --- | --- | --- |
| Human-wildlife conflicts | |  |  |  |  |  |  |  |
| Schools |  |  |  |  |  |  |  |  |
| Healthcare |  |  |  |  |  |  |  |  |
| Access to roads |  |  |  |  |  |  |  |  |
| Electricity |  |  |  |  |  |  |  |  |
| NTCA Package |  |  |  |  |  |  |  |  |
| Conflict with Forest Department | |  |  |  |  |  |  |  | |
|  |  |  |  |  |  |  |  |  |
| Conflict with Other______________ | |  |  |  |  |  |  |  | |
|  |  |  |  |  |  |  |  |  |
| Everyone else I know is moving | |  |  |  |  |  |  |  | |
|  |  |  |  |  |  |  |  |  |
| Other (Specify) |  |  |  |  |  |  |  |  |
|  |  |  |  |  |  |  |  |  |
| Other (Specify) |  |  |  |  |  |  |  |  |
|  |  |  |  |  |  |  |  |  |
| **B5. Interactions** |  |  |  |  |  |  |  |  |
|  |  |  |  |  |  |  | |  | |
| Institution | Frequency (annual) |  |  | Trust |  | Effective | |  | |
|  |  |  | | 1 = Distrust a lot; | | 1 = Very ineffective | |  |
|  | *General* | *Relocation Specific* | |  |
|  |  |  |  | 5 = Trust a lot | | 5 = Very effective | |  |
|  |  |  |  |  |  |  |  |  |
| Forest Dept |  |  |  |  |  |  |  |  |
|  |  |  |  |  |  |  |  |  |
| Revenue Dept |  |  |  |  |  |  |  |  |
|  |  |  |  |  |  |  |  |  |
| NGO (Name) |  |  |  |  |  |  |  |  |
|  |  |  |  |  |  |  |  |  |
|  |  |  |  |  |  |  |  |  |
|  |  |  |  |  |  |  |  |  |

**Survey No:** **Interviewer:** **Park:** **Date:**

**B6. Are you aware of Forest Rights Act? Yes or No** (Circle one)

**B7. Please describe:**

**B8. How did you hear of FRA?**

**B9. Post Relocation Plans (**S= Self, G = Govt, NGO = N, P= Private, Other = O)


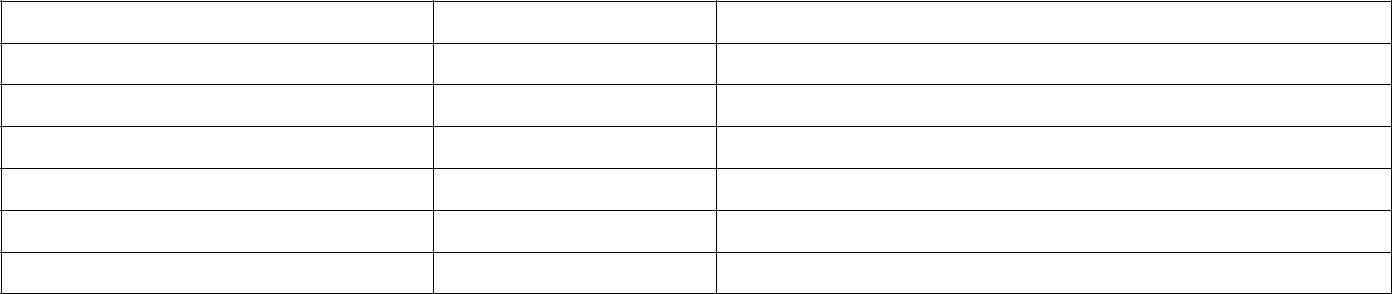


Opportunity Aware? (Yes/No) Source (S, G, N, P, O) and Name

New land selected by

Cash Compensation

Cash provided by

Housing provided by

School provided by

Health care provided by

**C1. Leisure Time:**

|  | Number of hours per week | | |  |  |  |  | **Men** | | | **Women** | | |  |
| --- | --- | --- | --- | --- | --- | --- | --- | --- | --- | --- | --- | --- | --- | --- |
|  |  |  |  |  |  | |  |  |  |  |  |  |  |  |
|  | Amount of money spent per week on entertainment activities | | | | | |  | **Men** | | | **Women** | | |  |
|  |  |  |  |  |  |  |  |  |  |  |  |  |  |  |
|  | **C2. Current Assets Owned** | | |  |  |  |  |  |  |  |  |  |  |  |
|  |  |  |  |  |  |  | |  |  |  |  |  |  |  |
|  | Type | Number |  | Type |  | Number | |  |  | Type |  | Number |  |  |
|  |  |  |  |  |  |  |  |  |  |  |  |  |  |  |
|  | Phone |  |  | Radio |  |  |  |  |  | Pump Set |  |  |  |  |
|  |  |  |  |  |  |  |  |  |  |  |  |  |  |  |
|  | Cycle |  |  | Television |  |  |  |  |  | Hay Cutter |  |  |  |  |
|  |  |  |  |  |  |  |  |  |  |  |  |  |  |  |
|  | Two Wheeler |  |  | Refrigerator |  |  |  |  |  | Tractor |  |  |  |  |
|  |  |  |  |  |  |  |  |  |  |  |  |  |  |  |
|  | Four Wheeler |  |  | Gas Stove |  |  |  |  |  | Plough |  |  |  |  |
|  |  |  |  | |  | | |  |  |  |  |  |  |  |
|  | **C3. Do women have access to** (Yes = 1, No = 0, If Yes describe) | | | | | | |  |  |  |  |  |  |  |
|  |  |  |  |  |  |  |  |  |  |  | |  |  |  |
|  | Anganwadi |  |  | Public Water Supply | |  |  |  | Non-Fuelwood Energy Sources | | | | |  |
|  |  |  |  |  |  |  |  |  |  |  |  |  |  |  |
|  |  |  |  |  |  |  |  |  |  |  |  |  |  |  |

**C4. Women’s Activities in Household** (Check all that apply)


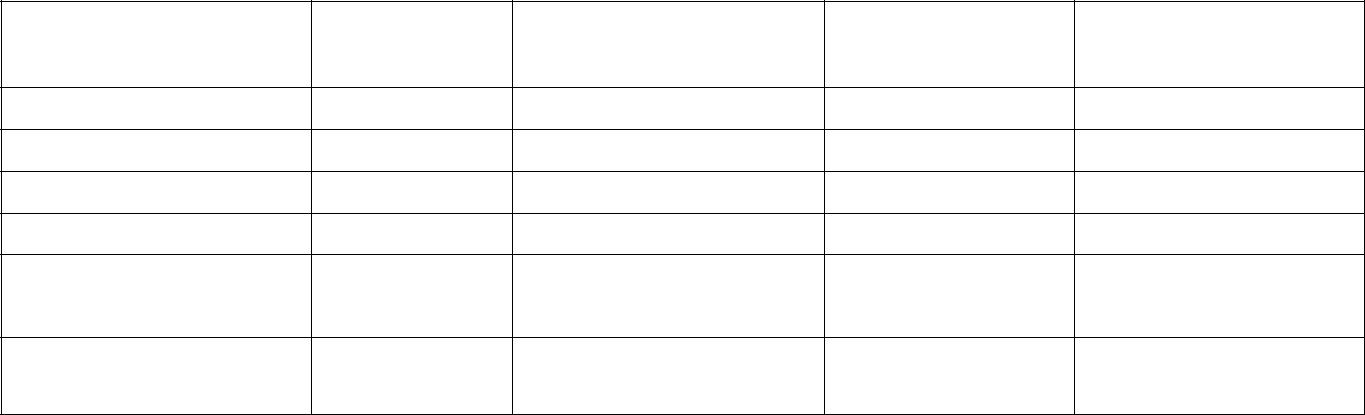


| **Activity** | **Alone** | **With Other Women With Men** | **With Children** |
| --- | --- | --- | --- |

Water Collection

Firewood

NTFP

Grazing

Market

(Sale/Purchase)

Other (Describe)

**Survey No:** **Interviewer:** **Park:** **Date:**

**C5. Do women of the household make any financial decisions independent of men? Yes/No. If Yes, about what?**

**D1. PA Dependence (percentage of total should add up to 100%)**

| Item | Private land | Park | Other forest | Non-forest | Market | Other |
| --- | --- | --- | --- | --- | --- | --- |
|  |  |  |  | common land |  | (Name) |
|  |  |  |  |  |  |  |
| Firewood |  |  |  |  |  |  |
|  |  |  |  |  |  |  |
| NTFP |  |  |  |  |  |  |
|  |  |  |  |  |  |  |
| Fodder |  |  |  |  |  |  |
|  |  |  |  |  |  |  |
| Grazing |  |  |  |  |  |  |
|  |  |  |  |  |  |  |
| Fertilizer |  |  |  |  |  |  |
|  |  |  |  |  |  |  |
| Timber |  |  |  |  |  |  |
|  |  |  |  |  |  |  |
| Hunting |  |  |  |  |  |  |
|  |  |  |  |  |  |  |
| Fishing |  |  |  |  |  |  |
|  |  |  |  |  |  |  |
| Bamboo |  |  |  |  |  |  |
|  |  |  |  |  |  |  |

**D2. What was your family’s cash income from sale of forest products?** (in Rupees, for all products)

| < 5,000 | 5-10,000 | 10-25,000 | 25-50,000 | > 50,000 |
| --- | --- | --- | --- | --- |
|  |  |  |  |  |

**D3. How many person-days were spent by you or members of your household in collecting the following during the last one year?**


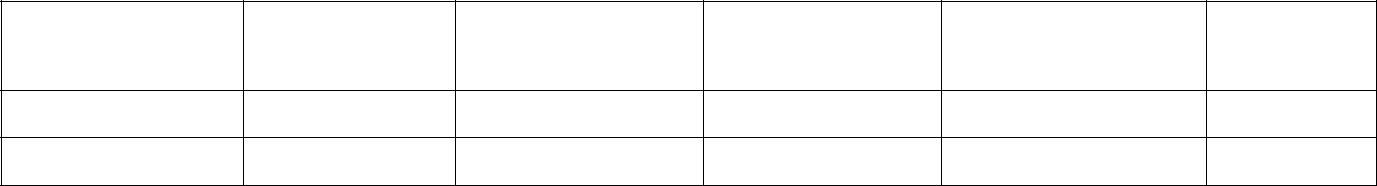


| Firewood | Water | Fodder | Grazing | NTFPs |
| --- | --- | --- | --- | --- |

Source

Days

Distance in km

**D4. What percentage of household energy needs is met by fuel wood collected from the PA? ______**

**D5. What other sources of energy are used in your household? Yes or No**

| Cowdung | Kerosene | LPG | Electricity | Biogas | Other |
| --- | --- | --- | --- | --- | --- |
|  |  |  |  |  |  |
|  |  |  |  |  |  |

**D6. Have you or anyone in your family been penalized for breaking forest rules? Yes or No (Describe)**

**D7. Water sources: Yes or No**


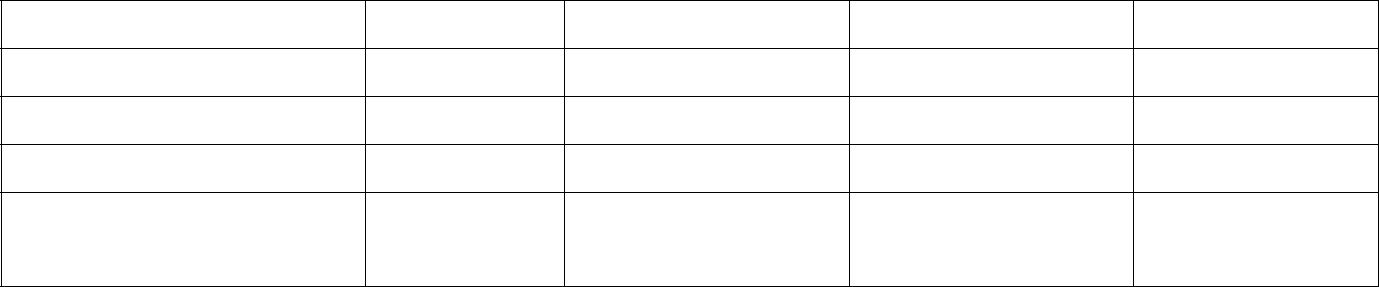


| **Water source** | **Summer** | **Monsoon** | **Winter** | **Spring** |
| --- | --- | --- | --- | --- |

Well

Bore-well

Public water

Stream/River

Distance walked (km)

**Survey No:** **Interviewer:** **Park:** **Date:**

**E1. A. Have you applied for relocation? Yes or No**

**B. If yes, when? (Date):**

**E2. A. Has valuation been completed? Yes or No**

**B. If yes, when?**

**C. Are you satisfied with the valuation?**

(1= Highly unsatisfied, 2= Unsatisfied, 3= Neither unsatisfied nor satisfied, 4= Satisfied, 5= Highly satisfied)

**E3. Have you received compensation? Yes or No**

A. **If yes, how much?** (Rs.)


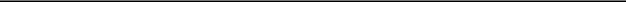


1. **Who gave it to you?**
2. **Are you satisfied with the compensation?**

(1= Highly unsatisfied, 2= Unsatisfied, 3= Neither unsatisfied nor satisfied, 4= Satisfied, 5= Highly satisfied)

1. **Have you received any of the following?**

| Cash | Land | Others |
| --- | --- | --- |
|  |  |  |
|  |  |  |

**E4. A. Are you aware of who provided funding? Yes or no**

**B. If yes, who?**

**E5. How many RTCs has your household been split into?**

Contact information:

Ph. No.:

Address:
